# Supplementary material for: Design of PCR assays to specifically detect and identify 37 Lactobacillus species in a single 96 well plate
Source: BMC Microbiol. 2020 Apr 15;20:96. doi: 10.1186/s12866-020-01781-z (PMC7160897; doi:10.1186/s12866-020-01781-z)
Supplement: Supplementary file 1 — Additional file 1: Table S1. General genome features of Lactobacillus species. [file 12866_2020_1781_MOESM1_ESM.xlsx]

## Sheet: Table S1
Additional file 1: Table S1. General genome features of Lactobacillus species.
Species	Strain	Size (Mb)	GC%	Genes	Proteins	Assembly	Accession no.
L. acetotolerans	NBRC 13120	1.70486	36.7	1686	1501	Complete genome	AP014808.1
L. acetotolerans	DSM 20749 (= KACC 12447)	1.58508	36.3	1532	1452	Scaffold	AYZC01
L. acidipiscis	ACA-DC 1533	2.60742	39.8	2455	2199	Complete genome	LT630287.1
L. acidipiscis	DSM 15836 (= KACC 12394)	2.32608	39.1	2215	2018	Scaffold	AZFI01
L. acidophilus	NCFM	1.99356	34.7	1927	1832	Complete genome	CP000033.3
L. acidophilus	La-14	1.99158	34.7	1978	1862	Complete genome	CP005926.2
L. acidophilus	FSI4	1.99197	34.7	1977	1868	Complete genome	CP010432.1
L. acidophilus	ATCC 53544	1.99191	34.7	1977	1852	Complete genome	CP022449.1
L. acidophilus	LA1	1.9912	34.7	2002	1886	Complete genome	CP017062.1
L. acidophilus	DSM 20079 (= KACC 12419)	2.00997	34.7	2020	1840	Complete genome	CP020620.1
L. agilis	La3	2.18721	41.6	2209	2042	Complete genome	CP016766.1
L. agilis	DSM 20509 (= KACC 12433)	2.05806	41.7	2075	1929	Scaffold	AYYP01
L. amylolyticus	L6	1.42	38.5	1355	1270	Complete genome	CP020457.1
L. amylolyticus	DSM 11664 (= KACC 12374)	1.6343	38.4	1708	1445	Contig	PUFF01
L. amylophilus	DSM 20533 (= KACC 11430)	1.61035	43.7	1675	1560	Complete genome	CP018888.1
L. amylovorus	30SC	2.09777	38.0807	2143	1925	Complete genome	CP002559.1
L. amylovorus	GRL1118	1.97709	37.9883	2002	1820	Complete genome	CP002609.1
L. amylovorus	DSM 20531 (= KACC 12435)	2.17277	37.8	2221	1895	Complete genome	CP017706.1
L. brevis	NPS-QW-145	2.55267	45.8	2495	2391	Complete genome	CP015398.1
L. brevis	TMW 1.2112	2.67355	45.72	2645	2338	Complete genome	CP016797.1
L. brevis	TMW 1.2113	2.66787	45.7	2633	2321	Complete genome	CP019750.1
L. brevis	TMW 1.2108	2.91798	45.27	2926	2738	Complete genome	CP019734.1
L. brevis	TMW 1.2111	2.88201	45.31	2877	2508	Complete genome	CP019743.1
L. brevis	100D8	2.47773	45.75	2509	2355	Complete genome	CP015338.1
L. brevis	SRCM101174	2.57125	45.59	2639	2474	Complete genome	CP021479.1
L. brevis	SRCM101106	2.55412	45.6	2583	2421	Complete genome	CP021674.1
L. brevis	DSM 20054 (= KCTC 3498)	2.47444	46	2452	2348	Scaffold	AZCP01
L. buchneri	NRRL B-30929	2.58831	44.21	2539	2368	Complete genome	CP002652.1
L. buchneri	CD034	2.56317	44.24	2476	2352	Complete genome	CP003043.1
L. buchneri	ATCC 4005 (= KACC 12416)	2.55179	44.4	2510	2341	Scaffold	PUFP01
L. casei	Zhang	2.89846	46.4194	2936	2762	Complete genome	CP001084.2
L. casei	12A	2.90789	46.4	2992	2801	Complete genome	CP006690.1
L. casei	W56	3.1321	46.2533	3326	3010	Complete genome	HE970764.1
L. casei	LOCK919	3.14337	46.1782	3276	3079	Complete genome	CP005486.1
L. casei	ATCC 393 (= KACC 12413)	2.95296	47.8636	2979	2636	Complete genome	AP012544.1
L. casei	LC5	3.13287	47.9	3093	2893	Complete genome	CP017065.1
L. coryniformis	DSM 20001 (= KACC 12411)	2.95151	43.1	2848	2672	Complete genome	CP017713.1
L. coryniformis	DSM 20004	3.13867	43.13	3077	2862	Complete genome	CP017697.1
L. crustorum	MN047	2.31648	35.06	2275	2137	Complete genome	CP017996.1
L. crustorum	JCM 15951 (= KACC 16344)	2.21951	35	2161	2059	Contig	AZDB01
L. curvatus	MRS6	2.11431	41.7	2064	1935	Complete genome	CP022474.1
L. curvatus	FBA2	1.84876	42.1	1905	1718	Complete genome	CP016028.1
L. curvatus	WiKim52	1.98699	42	2042	1875	Complete genome	CP016602.1
L. curvatus	WiKim38	1.94017	41.9	1994	1810	Complete genome	CP017124.1
L. curvatus	KG6	2.00276	42.0255	2075	1884	Complete genome	CP022475.1
L. curvatus	JCM 1096 (= KACC 12415)	1.91652	41.9856	1968	1799	Complete genome	CP026116.1
L. delbrueckii	ATCC 11842 (= KACC 12420)	1.865	49.7	1961	1626	Complete genome	CR954253.1
L. delbrueckii	ATCC BAA-365	1.85695	49.7	1964	1625	Complete genome	CP000412.1
L. delbrueckii	ND02	2.13198	49.5857	2153	1871	Complete genome	CP002341.1
L. delbrueckii	2038	1.87292	49.7	1959	1618	Complete genome	CP000156.1
L. delbrueckii	MN-BM-F01	1.87507	49.7	1964	1630	Complete genome	CP013610.1
L. farciminis	DSM 20184 (= KACC 12423)	2.55184	36.4	2524	2412	Complete genome	CP017702.1
L. fermentum	IFO 3956	2.09869	51.5	2134	1916	Complete genome	AP008937.1
L. fermentum	CECT 5716	2.10045	51.5	2137	1637	Complete genome	CP002033.1
L. fermentum	F-6	2.06462	51.7	2074	1874	Complete genome	CP005958.1
L. fermentum	3872	2.33049	50.5599	2367	2126	Complete genome	CP011536.1
L. fermentum	NCC2970	1.94987	52.2	1946	1770	Complete genome	CP017151.1
L. fermentum	SNUV175	2.27233	51.0589	2304	2108	Complete genome	CP019030.1
L. fermentum	MTCC 25067	2.01242	51.1759	2045	1688	Complete genome	AP017973.1
L. fermentum	IMDO 130101	2.0892	51.5	2029	1916	Complete genome	LT906621.1
L. fermentum	ATCC 14931 (= KACC 11441)	1.86701	52.6	1802	1663	Scaffold	ACGI01
L. gallinarum	HFD4	2.37478	36.74	2433	1901	Complete genome	CP012890.1
L. gallinarum	DSM 10532 (= KACC 12370)	1.93719	36.5	1967	1753	Scaffold	AZEL01
L. gallinarum	An153	2.02009	36.4	2072	1855	Contig	NFKZ01
L. gallinarum	An119	2.03934	36.5	2106	1885	Contig	NFLP01
L. gallinarum	An115	2.02052	36.5	2070	1851	Contig	NFLS01
L. gallinarum	An101	2.03051	36.5	2078	1859	Contig	NFLZ01
L. gasseri	ATCC 33323 (= KCTC 3163)	1.89436	35.3	1891	1754	Complete genome	CP000413.1
L. gasseri	4M13	2.12937	35	2139	1946	Complete genome	CP021427.1
L. gasseri	DSM 14869	1.95155	35.0427	1922	1715	Complete genome	CP006803.1
L. heilongjiangensis	DSM 28069	2.79	37.5	2492	2391	Complete genome	CP012559.1
L. heilongjiangensis	S4-3 (= KACC 18741)	2.73406	37.4	2523	2473	Contig	BJDV01
L. helveticus	CAUH18	2.16058	36.8	2219	1837	Complete genome	CP012381.1
L. helveticus	DPC 4571	2.08093	37.1	2125	1720	Complete genome	CP000517.1
L. helveticus	R0052	2.12921	36.8	2173	1761	Complete genome	CP003799.1
L. helveticus	H10	2.17238	36.8	2236	1901	Complete genome	CP002429.1
L. helveticus	CNRZ32	2.22596	36.9	2316	1833	Complete genome	CP002081.1
L. helveticus	H9	1.87112	37	1936	1546	Complete genome	CP002427.1
L. helveticus	KLDS1.8701	2.10663	36.8859	2172	1740	Complete genome	CP009907.1
L. helveticus	MB2-1	2.08406	36.9	2204	1771	Complete genome	CP011386.1
L. helveticus	D76	2.05832	37	2097	1694	Complete genome	CP016827.1
L. helveticus	D75	2.05307	37	2092	1693	Complete genome	CP020029.1
L. helveticus	FAM8627	2.04903	36.9856	2150	1666	Complete genome	CP015444.1
L. helveticus	FAM8105	2.25524	37.041	2368	1887	Complete genome	CP015496.1
L. helveticus	FAM22155	2.19866	37.0932	2296	1821	Complete genome	CP015498.1
L. helveticus	DSM 20075 (= KACC 12418)	2.02058	38	1857	1568	Scaffold	ACLM01
L. helveticus	LH5	2.16368	36.812	2220	1856	Complete genome	CP019581.1
L. helveticus	IDCC3801	2.15725	36.8188	2213	1851	Complete genome	CP035307.1
L. helveticus	LH99	2.08274	37.1	2204	1722	Complete genome	CP017982.1
L. helveticus	NWC_23	2.23298	37.5447	2385	1812	Complete genome	CP031016.1
L. helveticus	NWC_24	2.23013	37.3988	2318	1782	Complete genome	CP031018.1
L. jensenii	SNUV360	1.67	34.4	1626	1509	Complete genome	CP018809.1
L. jensenii	DSM 20557 (= KCTC 5194)	1.61063	34.3	1501	1434	Scaffold	AYYU01
L. johnsonii	FI9785	1.78512	34.4436	1765	1581	Complete genome	FN298497.1
L. johnsonii	DPC 6026	1.96634	34.8	1900	1773	Complete genome	CP002464.1
L. johnsonii	N6.2	1.88725	34.5	1788	1660	Complete genome	CP006811.1
L. johnsonii	BS15	2.15932	34.8756	2070	1807	Complete genome	CP016400.1
L. johnsonii	UMNLJ22	2.04239	35.1319	2000	1749	Complete genome	CP021704.1
L. johnsonii	UMNLJ21	2.01044	35.1174	1963	1726	Complete genome	CP021703.1
L. johnsonii	ATCC 33200 (= KCTC 3801)	1.7736	34.4	1727	1565	Contig	AZCY01
L. kunkeei	MP2	1.61452	36.9	1557	1446	Complete genome	CP012920.1
L. kunkeei	DSM 12361 (= KACC 19371)	1.5139	36.4	1380	1340	Scaffold	AZCK01
L. lindneri	TMW 1.1993	1.38974	34.2	1398	1270	Complete genome	CP014872.1
L. lindneri	TMW 1.481	1.45243	34.44	1480	1343	Complete genome	CP014907.1
L. lindneri	DSM 20690 (= KACC 12445)	1.44261	34.1	1477	1366	Scaffold	JQBT01
L. mucosae	LM1	2.43461	46.13	2292	2123	Complete genome	CP011013.1
L. mucosae	DSM 13345 (= KACC 12381)	2.25429	46.4	2049	1976	Contig	AZEQ01
L. parabuchneri	FAM21731	2.72658	43.46	2615	2444	Complete genome	CP018796.1
L. parabuchneri	DSM 5707 (= KACC 12363)	2.5661	43.4	2405	2294	Scaffold	AZGK01
L. paracasei	ATCC 334	2.92433	46.5563	2922	2764	Complete genome	CP000423.1
L. paracasei	8700:2	3.02535	46.3035	3134	2917	Complete genome	CP002391.1
L. paracasei	N1115	3.06428	46.4634	3263	2952	Complete genome	CP007122.1
L. paracasei	JCM 8130 (= KACC 12361)	3.0178	46.562	3198	2921	Complete genome	AP012541.1
L. paracasei	CAUH35	2.97335	46.3262	3153	2777	Complete genome	CP012187.1
L. paracasei	L9	3.07644	46.3	3169	2926	Complete genome	CP012148.1
L. paracasei	KL1	2.91889	46.6	3095	2793	Complete genome	CP013921.1
L. paracasei	IIA	3.24614	46.2225	3372	3116	Complete genome	CP014985.1
L. paracasei	TK1501	2.94254	46.5	3014	2776	Complete genome	CP017716.1
L. paracasei	FAM18149	2.96971	46.3429	3190	2828	Complete genome	CP017261.1
L. paracasei	TMW 1.1434	3.17011	46.3228	3015	2833	Complete genome	CP016355.1
L. paraplantarum	L-ZS9	3.13973	44	3046	2835	Complete genome	CP013130.1
L. paraplantarum	DSM 10667 (= KACC 12373)	3.36853	43.8938	3328	3098	Complete genome	CP032744.1
L. pentosus	SLC13	3.58301	46.41	3298	3069	Complete genome	CP022130.1
L. pentosus	BGM48	3.67681	46.13	3489	3205	Complete genome	CP016491.1
L. pentosus	DSM 20314 (= KACC 12428)	3.67137	46.3275	3420	3168	Complete genome	CP032757.1
L. plantarum	JDM1	3.19776	44.7	3084	2904	Complete genome	CP001617.1
L. plantarum	ST-III	3.30794	44.5045	3194	3020	Complete genome	CP002222.1
L. plantarum	WCFS1	3.34862	44.4501	3174	3063	Complete genome	AL935263.2
L. plantarum	ZJ316	3.29976	44.4457	3209	2972	Complete genome	CP004082.1
L. plantarum	plantarum	3.24663	44.5541	3207	2939	Complete genome	CP005942.2
L. plantarum	16	3.36102	44.3093	3281	3076	Complete genome	CP006033.1
L. plantarum	DOMLa	3.21011	44.6748	3103	2924	Complete genome	CP004406.1
L. plantarum	CGMCC 1.557	3.27324	44.4271	3214	3000	Complete genome	CP016270.1
L. plantarum	5-2	3.23765	44.7	3148	2991	Complete genome	CP009236.1
L. plantarum	ZS2058	3.19834	44.7	3077	2916	Complete genome	CP012343.1
L. plantarum	HFC8	3.40571	44.3323	3433	3065	Complete genome	CP012650.1
L. plantarum	LZ95	3.32246	44.4873	3232	3026	Complete genome	CP012122.1
L. plantarum	Zhang-LL	2.95222	44.9	2860	2650	Complete genome	CP011769.1
L. plantarum	JBE245	3.26261	44.5	3177	2993	Complete genome	CP014780.1
L. plantarum	CAUH2	3.27462	44.5484	3179	2998	Complete genome	CP015126.1
L. plantarum	ATCC 14917 (= KACC 11451)	3.21226	44.5	3054	2922	Scaffold	ACGZ02
L. reuteri	DSM 20016 (= KCTC 3594)	1.99962	38.9	2049	1917	Complete genome	CP000705.1
L. reuteri	JCM 1112	2.03941	38.9	2082	1943	Complete genome	AP007281.1
L. reuteri	SD2112	2.31684	39.0014	2332	2132	Complete genome	CP002844.1
L. reuteri	ATCC 53608	2.09124	38.7846	2088	1918	Complete genome	LN906634.1
L. reuteri	I5007	2.09328	38.9404	2091	1910	Complete genome	CP006011.1
L. reuteri	TD1	2.14545	38.8	2037	1890	Complete genome	CP006603.1
L. reuteri	IRT	1.99397	38.9	2024	1890	Complete genome	CP011024.1
L. reuteri	ZLR003	2.2341	38.7	2217	2024	Complete genome	CP014786.1
L. reuteri	I49	2.04477	38.8	1956	1786	Complete genome	CP015408.2
L. rhamnosus	ATCC 53103	3.00505	46.7	3059	2859	Complete genome	AP011548.1
L. rhamnosus	GG (ATCC 53103)	3.01011	46.7	3062	2860	Complete genome	FM179322.1
L. rhamnosus	Lc 705	3.03311	46.6319	3054	2811	Complete genome	FM179323.1
L. rhamnosus	ATCC 8530	2.96034	46.8	2958	2776	Complete genome	CP003094.1
L. rhamnosus	LOCK900	2.88338	46.8	2901	2734	Complete genome	CP005484.1
L. rhamnosus	LOCK908	2.9909	46.8	2988	2811	Complete genome	CP005485.1
L. rhamnosus	LRB	2.93495	46.8	2749	2428	Complete genome	CP016823.1
L. rhamnosus	BFE5264	3.11476	46.7581	3206	2931	Complete genome	CP014201.1
L. rhamnosus	Pen	2.88497	46.8	2908	2719	Complete genome	CP020464.1
L. rhamnosus	4B15	3.04784	46.7	3124	2928	Complete genome	CP021426.1
L. rhamnosus	LR5	2.97259	46.7	3006	2800	Complete genome	CP017063.1
L. rhamnosus	DSM 14870	3.01315	46.7	3057	2842	Complete genome	CP006804.1
L. rhamnosus	DSM 20021 (= KCTC 3237)	2.9491	46.7	2870	2728	Scaffold	AZCQ01
L. ruminis	ATCC 27782	2.06665	43.5	2136	1862	Complete genome	CP003032.1
L. ruminis	ATCC 27780 (= KACC 12429)	2.02588	43.4	1999	1837	Contig	JHAJ01
L. sakei	FAM18311	2.05656	41.0089	2109	1935	Complete genome	CP020459.1
L. sakei	23K	1.88466	41.3	1897	1771	Complete genome	CR936503.1
L. sakei	WiKim0063	2.07552	41.1743	2074	1956	Complete genome	CP022709.1
L. sakei	LT-13	1.94314	41.1834	1960	1823	Complete genome	AP017929.1
L. sakei	LK-145	1.99426	41.1508	2038	1893	Complete genome	AP017931.1
L. sakei	DS4	2.10357	41.1	2067	1959	Complete genome	CP025839.1
L. sakei	ATCC 15521 (= KCTC 3603)	1.93619	41.1	1924	1821	Contig	PUFE01
L. salivarius	Ren	1.97836	33.0757	1990	1816	Complete genome	CP011403.1
L. salivarius	CICC 23174	2.08359	32.8541	2062	1857	Complete genome	CP017107.1
L. salivarius	ZLS006	2.17758	33.2094	2177	1953	Complete genome	CP020858.1
L. salivarius	DSM 20554 (= KCTC 3600)	1.97182	32.6	1971	1871	Scaffold	NBEM01
L. sanfranciscensis	TMW 1.1304	1.37577	34.84	1456	1294	Complete genome	CP002461.1
L. sanfranciscensis	JCM 5668 (= KACC 12431)	1.26745	34.8	1363	1215	Contig	QRFO01
L. zymae	ACA-DC 3411	2.73413	52.9	2617	2469	Complete genome	LT854705.1
L. zymae	DSM 19395 (= KACC 16349)	2.7045	53.6	2505	2413	Scaffold	AZDW01
